# Supplementary material for: Assessing the importance of kelp forests for small-scale fisheries under a global change scenario
Source: Frontiers journal article supplement (doi:10.3389/fmars.2022.973251), 2022-09-20
Supplement: Presentation_1.pdf [file Presentation_1.pdf]

## Supplementary Material

### 1 Supplementary Tables

**Supplementary Table S1.** Main species associated to NW Iberia kelp forest that are of economic value for small-scale fisheries.

| Group      | Species                           |
|------------|-----------------------------------|
| Finfish    | <i>Ammodytes</i> spp.             |
|            | <i>Balistes capriscus</i>         |
|            | <i>Boops boops</i>                |
|            | <i>Chelon labrosus</i>            |
|            | <i>Conger conger</i>              |
|            | <i>Coris julis</i>                |
|            | <i>Dicentrarchus labrax</i>       |
|            | <i>Diplodus sargus</i>            |
|            | <i>Labrus bergylta</i>            |
|            | <i>Mullus surmuletus</i>          |
|            | <i>Pagellus bogaraveo</i>         |
|            | <i>Pollachius pollachius</i>      |
|            | <i>Sarpa salpa</i>                |
|            | <i>Scorpaena scrofa</i>           |
|            | <i>Serranus cabrilla</i>          |
|            | <i>Sparus aurata</i>              |
|            | <i>Spondyllosoma cantharus</i>    |
|            | <i>Symphodus</i> spp.             |
|            | <i>Trisopterus luscus</i>         |
|            | <i>Zeus faber</i>                 |
| Crustacean | <i>Cancer pagurus</i>             |
|            | <i>Homarus gammarus</i>           |
|            | <i>Maja brachydactyla</i>         |
|            | <i>Necora puber</i>               |
|            | <i>Palaemon serratus</i>          |
|            | <i>Palinurus elephas</i>          |
|            | <i>Plesiopenaeus edwardsianus</i> |
|            | <i>Scyllarus arctus</i>           |
| Mollusk    | <i>Octopus vulgaris</i>           |
|            | <i>Sepia officinalis</i>          |
| Echinoderm | <i>Holothuroidea</i>              |
|            | <i>Paracentrotus lividus</i>      |
| Gastropods | <i>Haliotis tubercula</i>         |
| Seaweeds   | <i>Laminariaceae</i>              |

**Supplementary Table S2.** Main seaweeds harvested in the Ría the Vigo and *cofradías* involved.

|                                                         | <b>A Guarda</b> | <b>Baiona</b> | <b>Cangas</b> | <b>Moaña</b> | <b>Vigo</b> | <b>Vigo<br/>(Canido)</b> |
|---------------------------------------------------------|-----------------|---------------|---------------|--------------|-------------|--------------------------|
| <b>Brown seaweed</b>                                    |                 |               | X             |              |             |                          |
| <b>Green seaweed</b>                                    |                 | X             | X             |              |             | X                        |
| <b>Red seaweed</b>                                      | X               |               |               |              |             |                          |
| <b>Identified seaweeds</b>                              |                 |               | X             |              |             |                          |
| <b>Argazo<br/>(Laminariales)</b>                        |                 |               | X             |              |             | X                        |
| <b>Argazo bravo<br/>(<i>Saccorhiza polyschides</i>)</b> |                 | X             | X             |              |             |                          |
| <b>Correa<br/>(<i>Himanthalia elongata</i>)</b>         |                 |               |               | X            |             |                          |
| <b>Fideo de mar<br/>(<i>Codium</i> spp.)</b>            |                 | X             | X             |              | X           | X                        |
| <b>Golfo<br/>(<i>Undaria pinnatifida</i>)</b>           |                 |               | X             |              |             | X                        |

Source: Fish auction sales: seaweed: Zone 1 Vigo: From 01/01/2020 to 31/12/2021  
<https://www.pescadegalicia.gal/estadisticas/>

1.1 Supplementary Figures

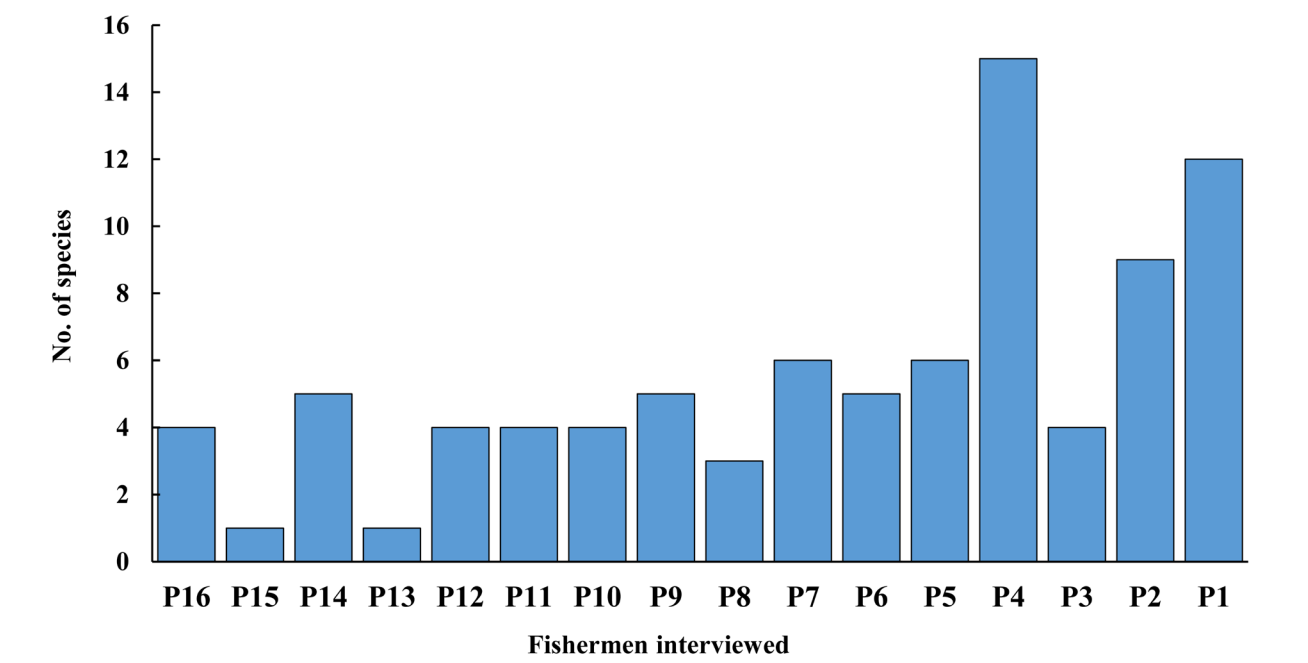

Supplementary Figure S1. Number of species fished throughout the year.

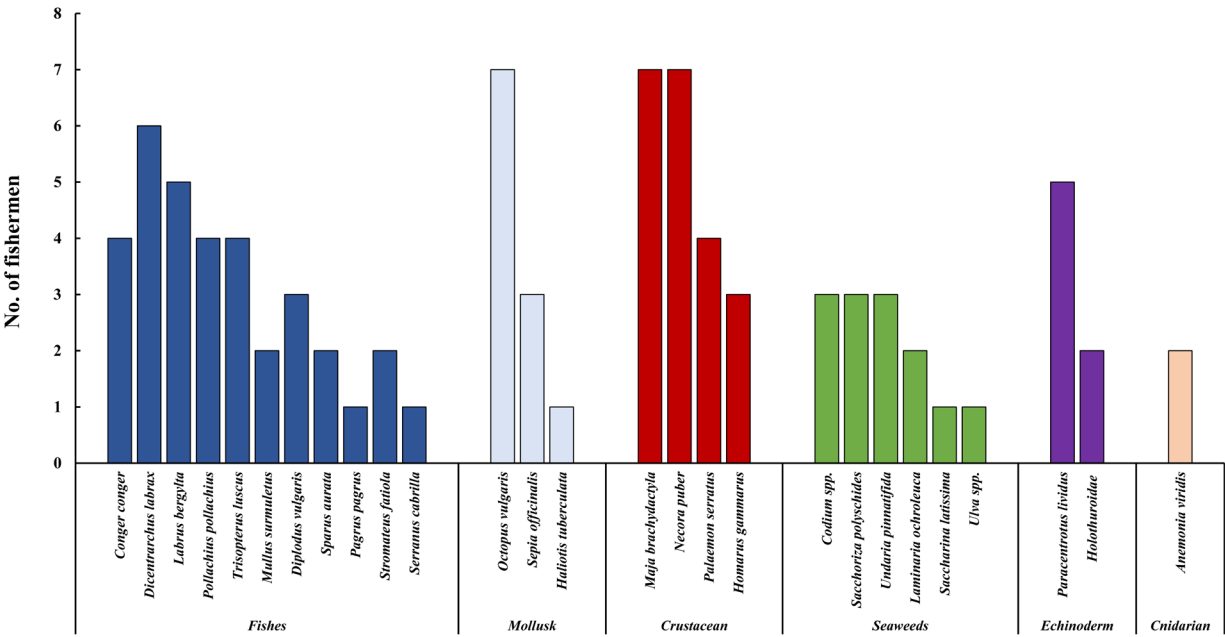

**Supplementary Figure S2.** Number of fishermen interviewed who fish for one of the main commercial species they reported catching most frequently.

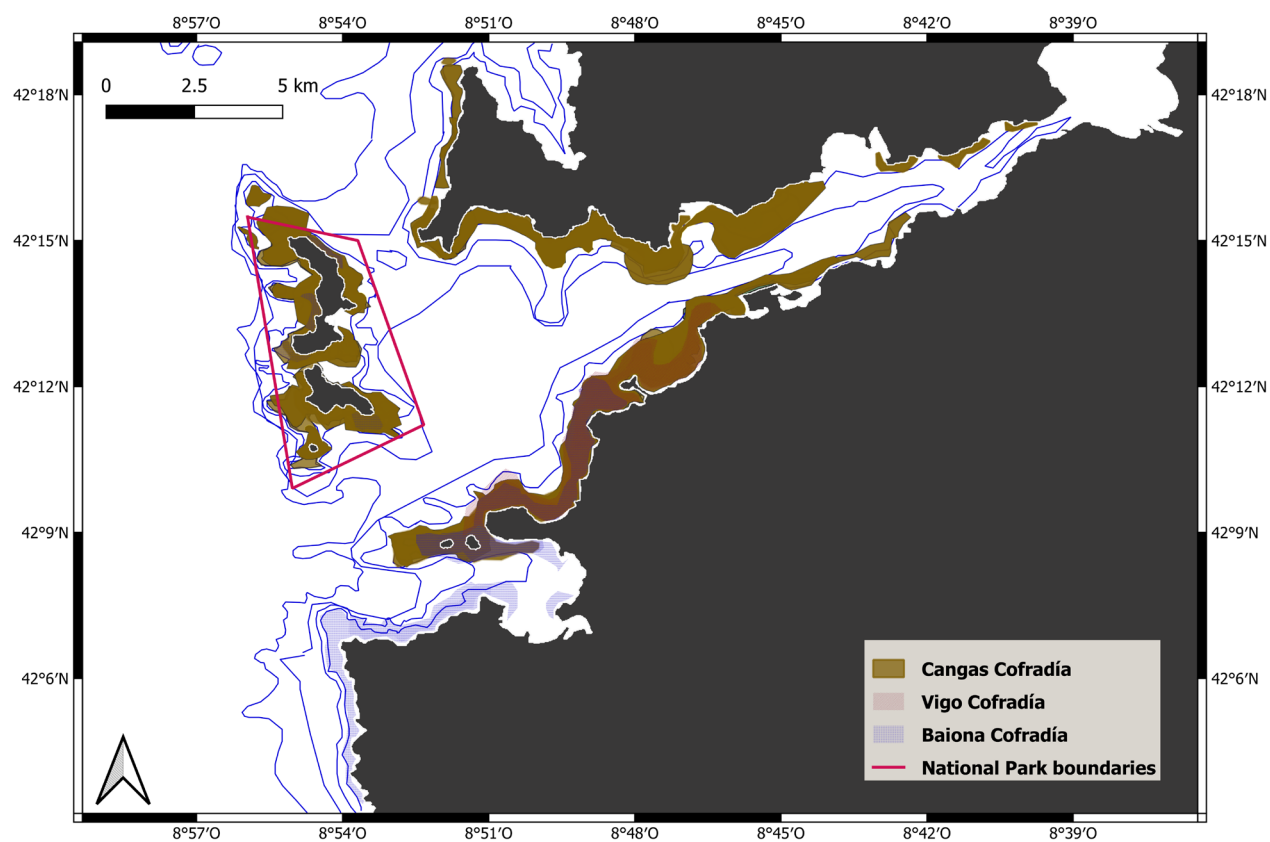

**Supplementary Figure S3.** Fishing areas of the fishers interviewed. The different colors represent the fisher's *cofradía* to which each fisher belongs.

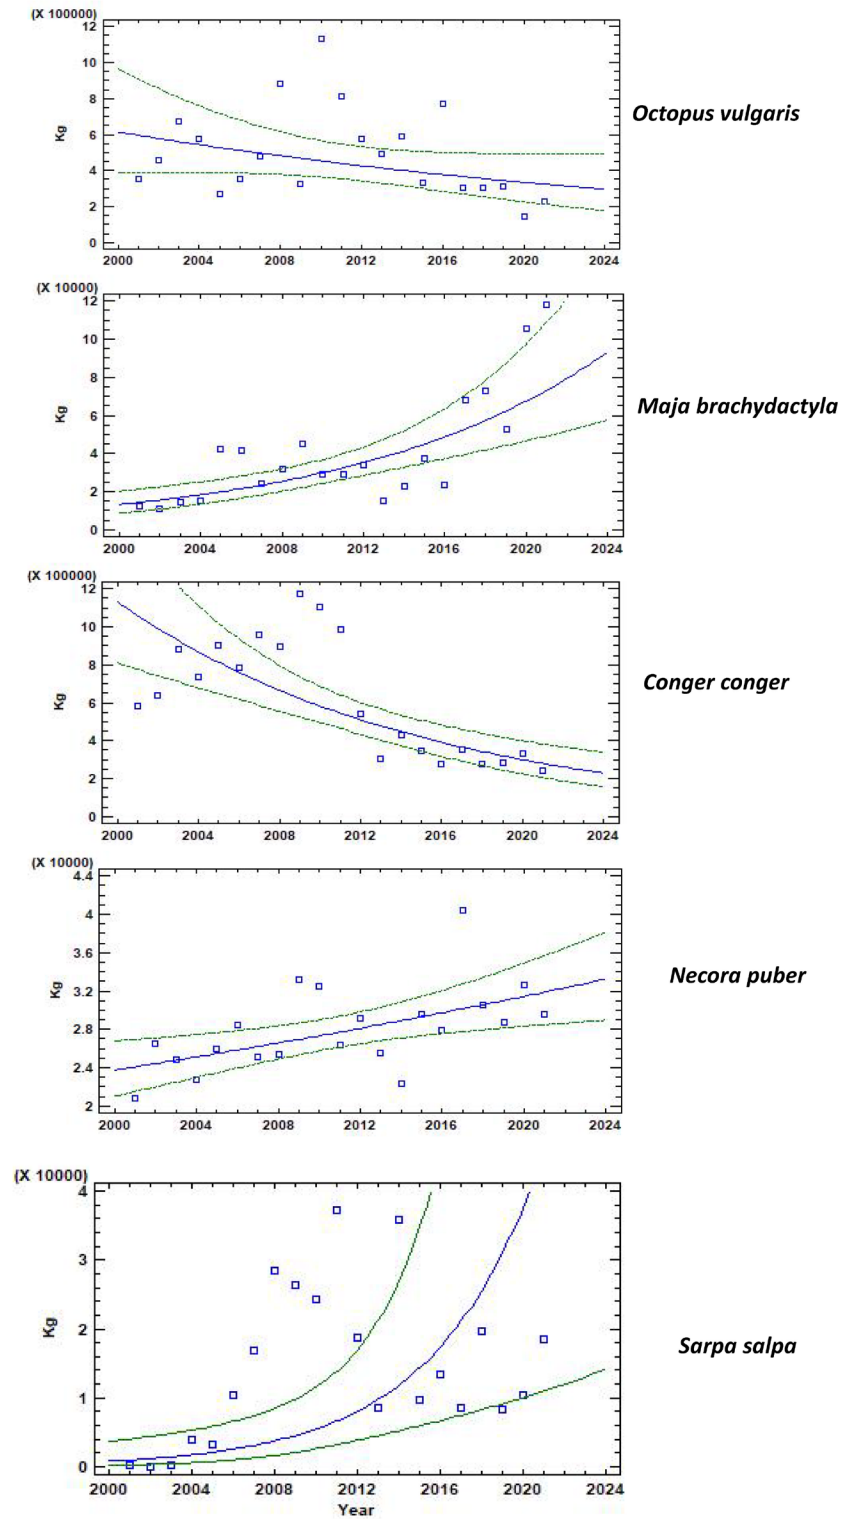

**Supplementary Figure S4.** Simple regression models (continuous blue lines) and their 95% confidence intervals (dotted green lines) fitted to landings of species that showed a trend over the last 20 years.

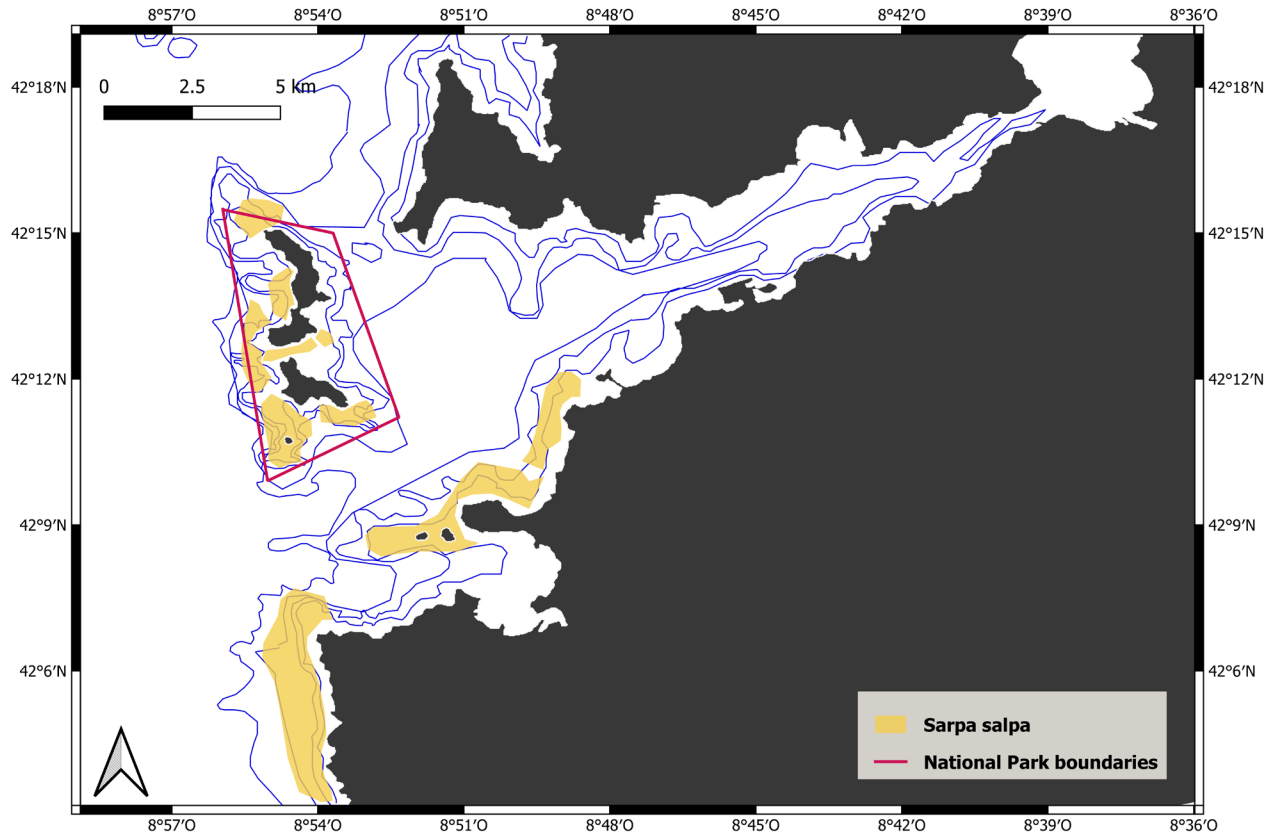

**Supplementary Figure S5.** Areas in which the fishers interviewed reported fishing for the herbivorous *Sarpa salpa* with greater frequency and abundance.
